# Supplementary material for: Studies on the structure and chirality of A-motif in adenosine monophosphate nucleotide metal coordination complexes
Source: Royal Society of Chemistry journal article supplement (doi:10.1039/d1ce00276g), 2021-01-01
Supplement: d1ce00276g1.pdf [file d1ce00276g1.pdf]

## SUPPORTING INFORMATION

### **Studies on Structure and Chirality of A-Motif in Adenosine Monophosphate Nucleotide Metal Coordination Complexes**

Muhammad Javed Iqbal,<sup>1</sup> Zhongkui Li,<sup>1</sup> Maroof Ahmad Khan, Yanhong Zhu, Wajid Hussain, Hao  
Su, Qi-Ming Qiu, Rizwan Shoukat, Hui Li\*

<sup>1</sup> Muhammad Javed Iqbal and Zhongkui Li contribute to this manuscript equivalently.

Key Laboratory of cluster Science of Ministry of education, School of Chemistry and Chemical  
Engineering, Beijing Institute of Technology, Beijing 100081, P. R. China

Analytical and Testing Centre, Beijing Institute of Technology, Beijing 10081, P. R. China

**Table S1.** Selected Bond Lengths for Complexes 1-3.

| Complex 1           |          | Complex 2           |           | Complex 3           |          |
|---------------------|----------|---------------------|-----------|---------------------|----------|
| Bond                | Length/Å | Bond                | Length/Å  | Bond                | Length/Å |
| Cd1-O1 <sup>1</sup> | 2.405(3) | Mn1-O1              | 2.271(5)  | Cd1-O1              | 2.368(3) |
| Cd1-O1              | 2.404(3) | Mn1-O1 <sup>2</sup> | 2.271(5)  | Cd1-O2              | 2.292(3) |
| Cd1-O2              | 2.234(3) | Mn1-O2 <sup>2</sup> | 2.100(5)  | Cd1-O3              | 2.348(3) |
| Cd1-O2 <sup>1</sup> | 2.234(3) | Mn1-O2              | 2.100(5)  | Cd1-O4              | 2.240(3) |
| Cd1-N1              | 2.333(3) | Mn1-N1 <sup>2</sup> | 2.302(5)  | Cd1-N1              | 2.347(4) |
| Cd1-N1 <sup>1</sup> | 2.333(3) | Mn1-N1              | 2.302(5)  | Cd1-N2 <sup>3</sup> | 2.306(4) |
| P1-O2               | 1.499(3) | P1-O2               | 1.506(5)  | P1-O4               | 1.519(3) |
| P1-O3               | 1.530(4) | P1-O3               | 1.525(6)  | P1-O5               | 1.514(3) |
| P1-O4               | 1.504(4) | P1-O4               | 1.499(6)  | P1-O6               | 1.513(3) |
| P1-O5               | 1.609(3) | P1-O5               | 1.609(5)  | P1-O7               | 1.600(2) |
| O5-C13              | 1.431(6) | O5-C13              | 1.421(10) | O7-C13              | 1.427(4) |
| O6-C14              | 1.427(5) | O6-C14              | 1.424(9)  | O8-C13              | 1.407(4) |
| O6-C17              | 1.424(6) | O6-C17              | 1.412(9)  | O9-C15              | 1.406(4) |
| O7-C15              | 1.421(6) | O7-C15              | 1.426(9)  | O10-C14             | 1.437(4) |
| N1-C1               | 1.353(6) | N1-C1               | 1.341(9)  | O10-C16             | 1.426(4) |
| N1-C5               | 1.322(5) | N1-C5               | 1.316(9)  | N1-C1               | 1.322(6) |
| N3-C17              | 1.447(5) | N3-C17              | 1.451(9)  | N1-C5               | 1.325(6) |
| N3-C18              | 1.374(6) | N3-C18              | 1.362(9)  | N2-C17              | 2.306(4) |
| N3-C20              | 1.389(6) | N3-C20              | 1.377(9)  | N2-C10              | 1.351(6) |
| N4-C18              | 1.307(6) | N4-C18              | 1.303(10) | N2-C12              | 1.347(6) |
| N4-C19              | 1.388(6) | N4-C19              | 1.381(10) | N3-C16              | 1.465(4) |
| N5-C20              | 1.347(6) | N5-C20              | 1.354(9)  | N3-C17              | 1.368(4) |
| N5-C21              | 1.313(7) | N5-C21              | 1.335(10) | N3-C19              | 1.382(4) |
| N6-C21              | 1.337(6) | N6-C21              | 1.331(10) | N4-C17              | 1.301(5) |
| N6-C22              | 1.358(7) | N6-C22              | 1.359(11) | N4-C18              | 1.380(5) |
| N7-C22              | 1.334(7) | N7-C22              | 1.344(10) | N5-C19              | 1.335(5) |

Symmetry code: #1 2-x, 1-y, z; #2 1-x, 1-y, +z; #3 +x, +y, 1+z.

**Table S2.** Selected Bond Angles for Complex 1.

| Angle                                | Angle/°    | Angle                  | Angle/°   |
|--------------------------------------|------------|------------------------|-----------|
| O1–Cd1–O1 <sup>1</sup>               | 91.23(15)  | C5–C4–C3               | 119.6(4)  |
| O2–Cd1–O1 <sup>1</sup>               | 174.72(17) | N1–C5–C4               | 123.2(4)  |
| O2 <sup>1</sup> –Cd1–O1 <sup>1</sup> | 87.69(12)  | C6 <sup>2</sup> –C6–C3 | 125.5(5)  |
| O2 <sup>1</sup> –Cd1–O1              | 174.72(17) | O5–C13–C14             | 109.7(4)  |
| O2–Cd1–O1                            | 87.69(12)  | O6–C14–C13             | 109.8(4)  |
| O2 <sup>1</sup> –Cd1–O2              | 93.85(17)  | O6–C14–C15             | 106.5(4)  |
| O2–Cd1–N1                            | 96.64(13)  | C13–C14–C15            | 117.2(4)  |
| O2–Cd1–N1 <sup>1</sup>               | 90.93(13)  | O7–C15–C14             | 108.6(4)  |
| O2 <sup>1</sup> –Cd1–N1 <sup>1</sup> | 96.64(13)  | O7–C15–C16             | 112.2(4)  |
| O2 <sup>1</sup> –Cd1–N1              | 90.93(13)  | C14–C15–C16            | 101.6(4)  |
| N1–Cd1–O1 <sup>1</sup>               | 88.37(14)  | C17–C16–C15            | 102.6(4)  |
| N1–Cd1–O1                            | 83.88(14)  | O6–C17–N3              | 106.9(4)  |
| N1 <sup>1</sup> –Cd1–O1 <sup>1</sup> | 83.88(14)  | O6–C17–C16             | 105.8(4)  |
| N1 <sup>1</sup> –Cd1–O1              | 88.37(14)  | N3–C17–C16             | 115.6(4)  |
| N1–Cd1–N1 <sup>1</sup>               | 168.92(16) | N4–C18–C3              | 114.2(4)  |
| O2–P1–O3                             | 111.2(2)   | N4–C19–C22             | 131.9(5)  |
| O2–P1–O4                             | 114.8(2)   | C20–C19–N4             | 111.4(4)  |
| O2–P1–O5                             | 108.9(2)   | C20–C19–C22            | 116.7(5)  |
| O3–P1–O5                             | 104.2(2)   | N5–C20–N3              | 127.0(4)  |
| O4–P1–O3                             | 112.2(3)   | N5–C20–C19             | 127.3(5)  |
| O4–P1–O5                             | 104.6(2)   | C19–C20–N3             | 105.7(4)  |
| P1–O2–Cd1                            | 135.5(2)   | N5–C21–N6              | 129.6(5)  |
| C13–O5–P1                            | 117.2(3)   | N6–C22–C19             | 117.3(5)  |
| C17–O6–C14                           | 110.3(4)   | N7–C22–N6              | 119.8(5)  |
| C1–N1–Cd1                            | 119.5(3)   | N7–C22–C19             | 122.9(6)  |
| C5–N1–Cd1                            | 122.2(3)   | C7–N2–C11              | 120.0(5)  |
| C5–N1–C1                             | 118.1(3)   | N2–C7–C8               | 121.2(6)  |
| C18–N3–C17                           | 127.7(4)   | C7–C8–C9               | 121.7(6)  |
| C18–N3–C20                           | 105.1(4)   | C8–C9–C10              | 117.1(5)  |
| C20–N3–C17                           | 126.8(4)   | C8–C9–C12B             | 116.4(5)  |
| C18–N4–C19                           | 103.6(4)   | C8–C9–C12A             | 146.4(11) |
| C21–N5–C20                           | 110.6(4)   | C10–C9–C12B            | 126.5(6)  |
| C21–N6–C22                           | 118.5(4)   | C10–C9–C12A            | 96.2(11)  |
| N1–C1–C2                             | 122.4(4)   | C11–C10–C9             | 119.6(6)  |
| C1–C2–C3                             | 119.6(4)   | N2–C11–C10             | 120.5(5)  |

Symmetry code: #1 2-x, 1-y, +z.

**Table S3.** Selected Hydrogen Bonds for Complex **1** and Complex **2**.**Complex 1**

| D-H-A                    | d(D-H)/Å | d(H...A)/Å | d(D-A)/Å | D-H-A/° |
|--------------------------|----------|------------|----------|---------|
| O1-H1A...O4              | 0.89     | 1.95       | 2.767(5) | 151     |
| O3-H3...N2               | 0.82     | 1.79       | 2.536(6) | 151     |
| O7-H7...O10 <sup>1</sup> | 0.82     | 1.99       | 2.789(8) | 165     |
| N7-H7B...N4 <sup>2</sup> | 0.86     | 2.21       | 3.015(7) | 156     |

Symmetry code: #1 1+x, +y, +z; #2 2-x, 2-y, z.

**Complex 2**

| D-H-A                    | d(D-H)/Å | d(H...A)/Å | d(D-A)/Å  | D-H-A/° |
|--------------------------|----------|------------|-----------|---------|
| O1-H1B...O4              | 0.85     | 1.99       | 2.783(8)  | 155     |
| O3-H3...N2               | 0.82     | 1.71       | 2.516(9)  | 167     |
| O7-H7...O10 <sup>1</sup> | 0.82     | 2.06       | 2.863(15) | 168     |
| N7-H7B...N4 <sup>2</sup> | 0.86     | 2.18       | 2.995(9)  | 156     |

Symmetry code: #1 -x, y, 1+z; #2 1-x, -y, z.

**Table S4.** Selected Bond Angles for Complex 2.

| Atoms                                | Angle/°   | Atoms                  | Angle/°   |
|--------------------------------------|-----------|------------------------|-----------|
| O1 <sup>1</sup> -Mn1-O1              | 88.6(3)   | C3-C4-C5               | 119.0(7)  |
| O1-Mn1-N1 <sup>1</sup>               | 88.8(2)   | N1-C5-C4               | 124.0(7)  |
| O1-Mn1-N1                            | 83.5(2)   | C6 <sup>2</sup> -C6-C3 | 125.9(9)  |
| O1 <sup>1</sup> -Mn1-N1 <sup>1</sup> | 83.5(2)   | O5-C13-C14             | 110.3(7)  |
| O1 <sup>1</sup> -Mn1-N1              | 88.8(2)   | O6-C14-C13             | 110.9(7)  |
| O2-Mn1-O1 <sup>1</sup>               | 173.0(2)  | O6-C14-C15             | 106.2(6)  |
| O2 <sup>1</sup> -Mn1-O1 <sup>1</sup> | 87.95(18) | C15-C14-C13            | 115.5(7)  |
| O2-Mn1-O1                            | 87.95(18) | O7-C15-C14             | 108.4(7)  |
| O2 <sup>1</sup> -Mn1-O1              | 173.0(2)  | O7-C15-C16             | 112.3(6)  |
| O2-Mn1-O2 <sup>1</sup>               | 96.2(3)   | C14-C15-C16            | 102.8(6)  |
| O2-Mn1-N1                            | 96.9(2)   | C17-C16-C15            | 101.5(6)  |
| O2-Mn1-N1 <sup>1</sup>               | 90.3(2)   | O6-C17-N3              | 107.4(6)  |
| O2 <sup>1</sup> -Mn1-N1              | 90.3(2)   | O6-C17-C16             | 105.7(6)  |
| O2 <sup>1</sup> -Mn1-N1              | 96.9(2)   | N3-C17-C16             | 115.4(6)  |
| N1 <sup>1</sup> -Mn1-N1              | 169.2(3)  | N4-C18-C3              | 114.3(7)  |
| O2-P1-O3                             | 110.9(3)  | N4-C19-C22             | 132.5(8)  |
| O2-P1-O5                             | 109.7(3)  | C20-C19-N4             | 111.3(6)  |
| O5-P1-O5                             | 104.1(3)  | C20-C19-C22            | 116.2(8)  |
| O4-P1-O2                             | 114.1(3)  | N5-C20-N3              | 126.8(6)  |
| O4-P1-O3                             | 113.4(4)  | N5-C20-C19             | 127.7(7)  |
| O4-P1-O5                             | 104.0(3)  | C19-C20-N3             | 105.5(6)  |
| P1-O2-Mn1                            | 139.0(3)  | N5-C21-N6              | 129.4(8)  |
| C13-O5-P1                            | 117.9(5)  | N6-C22-C19             | 118.7(8)  |
| C17-O6-C14                           | 110.6(6)  | N7-C22-N6              | 118.8(7)  |
| C1-N1-Mn1                            | 120.4(5)  | N7-C22-C19             | 122.5(8)  |
| C5-N1-Mn1                            | 122.6(5)  | C7-N2-C11              | 119.3(8)  |
| C5-N1-C1                             | 116.9(6)  | N2-C7-C8               | 122.0(9)  |
| C18-N3-C17                           | 127.0(6)  | C7-C8-C9               | 120.9(10) |
| C18-N3-C20                           | 105.5(6)  | C8-C9-C10              | 117.3(9)  |
| C20-N3-C17                           | 127.1(6)  | C8-C9-C12B             | 145(2)    |
| C18-N4-C19                           | 103.4(6)  | C8-C9-C12A             | 110.7(16) |
| C21-N5-C20                           | 110.0(6)  | C10-C9-C12B            | 97(2)     |
| C21-N6-C22                           | 117.9(6)  | C10-C9-C12A            | 132.0(17) |
| N1-C1-C2                             | 123.9(7)  | C11-C10-C9             | 119.0(9)  |
| C1-C2-C3                             | 118.8(7)  | N2-C11-C10             | 121.5(9)  |

Symmetry code: #1 2-x, 1-y, +z.

**Table S5.** Selected Bond Angles for Complex 3.

| Atoms                   | Angle/°    | Atoms       | Angle/°  |
|-------------------------|------------|-------------|----------|
| O2–Cd1–O1               | 83.39(12)  | C2–C3–C6    | 122.8(4) |
| O2–Cd1–O3               | 169.44(11) | C4–C3–C2    | 117.3(4) |
| O2–Cd1–N1               | 90.18(14)  | C4–C3–C6    | 119.9(4) |
| O2–Cd1–N2 <sup>1</sup>  | 86.07(13)  | C3–C4–C5    | 120.6(4) |
| O3–Cd1–O1               | 87.59(11)  | N1–C5–C4    | 121.7(4) |
| O4–Cd1–O1               | 170.34(10) | C7–C6–C3    | 126.1(4) |
| O4–Cd1–O2               | 102.07(11) | C6–C7–C8    | 124.5(4) |
| O4–Cd1–O3               | 87.64(11)  | C9–C8–C7    | 119.6(4) |
| O4–Cd1–N1               | 86.54(13)  | C11–C8–C7   | 123.7(4) |
| O4–Cd1–N2 <sup>1</sup>  | 98.13(12)  | C11–C8–C9   | 116.7(4) |
| N1–Cd1–O1               | 85.47(12)  | C10–C9–C8   | 120.0(4) |
| N1–Cd1–O3               | 94.57(14)  | N2–C10–C9   | 123.0(4) |
| N2 <sup>1</sup> –Cd1–O1 | 90.14(12)  | C8–C11–C12  | 120.5(4) |
| N2 <sup>1</sup> –Cd1–O3 | 88.48(13)  | N2–C12–C11  | 122.6(4) |
| N2 <sup>1</sup> –Cd1–N1 | 174.53(16) | O7–C13–C14  | 109.1(2) |
| O4–P1–O7                | 102.47(16) | O10–C14–C13 | 109.3(3) |
| O5–P1–O4                | 111.99(16) | O10–C14–C23 | 104.0(2) |
| O5–P1–O7                | 108.12(17) | C13–C14–C23 | 116.1(3) |
| O6–P1–O4                | 112.73(19) | O9–C15–C16  | 110.9(3) |
| O6–P1–O5                | 113.4(2)   | O9–C15–C23  | 107.7(3) |
| O6–P1–O7                | 107.29(19) | C23–C15–C16 | 102.2(3) |
| P1–O4–Cd1               | 135.00(18) | O10–C16–N3  | 108.1(3) |
| C1–N1–Cd1               | 119.6(2)   | O10–C16–C15 | 107.0(3) |
| C13–O7–P1               | 109.6(2)   | N3–C16–C15  | 113.7(3) |
| C16–O10–C14             | 123.1(3)   | N4–C17–N3   | 113.8(3) |
| C1–N1–Cd1               | 117.9(4)   | N4–C18–C19  | 110.7(3) |
| C1–N1–C5                | 119.0(3)   | N4–C18–C21  | 133.3(3) |
| C10–N2–Cd1 <sup>2</sup> | 123.5(3)   | C19–C18–21  | 116.0(4) |
| C12–N2–Cd1 <sup>2</sup> | 119.5(3)   | N3–C19–C18  | 105.3(3) |
| C12–N2–C10              | 117.0(4)   | N5–C19–N3   | 127.7(3) |
| C17–N3–C16              | 128.6(3)   | N5–C19–C18  | 126.9(3) |
| C17–N3–C19              | 105.8(3)   | N6–C20–N5   | 128.2(4) |

| Atoms      | Angle/°  | Atoms       | Angle/°  |
|------------|----------|-------------|----------|
| C19–N3–C16 | 125.6(3) | N6–C21–C18  | 118.4(4) |
| C17–N4–C18 | 104.4(3) | N7–C21–N6   | 119.0(4) |
| C19–N5–C20 | 111.5(3) | N7–C21–C18  | 122.6(5) |
| C20–N6–C21 | 118.9(4) | O8–C23–C18  | 112.1(2) |
| N1–C1–C2   | 123.8(5) | O8–C23–C15  | 114.8(3) |
| C1–C2–C3   | 118.5(4) | C15–C23–C14 | 101.6(3) |

Symmetry code: #1 +x, +y, 1+z.

**Table S6.** Selected Hydrogen Bonds for Complex **3**.

| D–H…A                     | d(D–H)/Å | d(H…A)/Å | d(D–A)/Å | D–H–A/° |
|---------------------------|----------|----------|----------|---------|
| O2–H2A…O13                | 0.94     | 2.07     | 2.746(4) | 159     |
| O2–H2B…O14                | 0.94     | 1.91     | 2.755(5) | 154     |
| O8–H8…O5 <sup>1</sup>     | 0.82     | 1.85     | 2.719(4) | 161     |
| O9–H9…O15 <sup>2</sup>    | 0.86     | 1.87     | 2.730(7) | 167     |
| N7–H7B…O17                | 0.85     | 2.12     | 2.892(7) | 148     |
| O11–H11A…O6               | 0.85     | 1.94     | 2.725(5) | 162     |
| O11–H11B…N6 <sup>3</sup>  | 0.85     | 1.85     | 2.804(5) | 148     |
| O13–H13C…O12              | 0.85     | 1.91     | 2.725(5) | 146     |
| O13–H13D…O11 <sup>4</sup> | 0.85     | 1.94     | 2.733(5) | 153     |

Symmetry code: #1 -1+x, +y, +z; #2 -1+x, -1+y, z; #3 +x, -1+y, -1+z; #4 +x, y+1, +z.

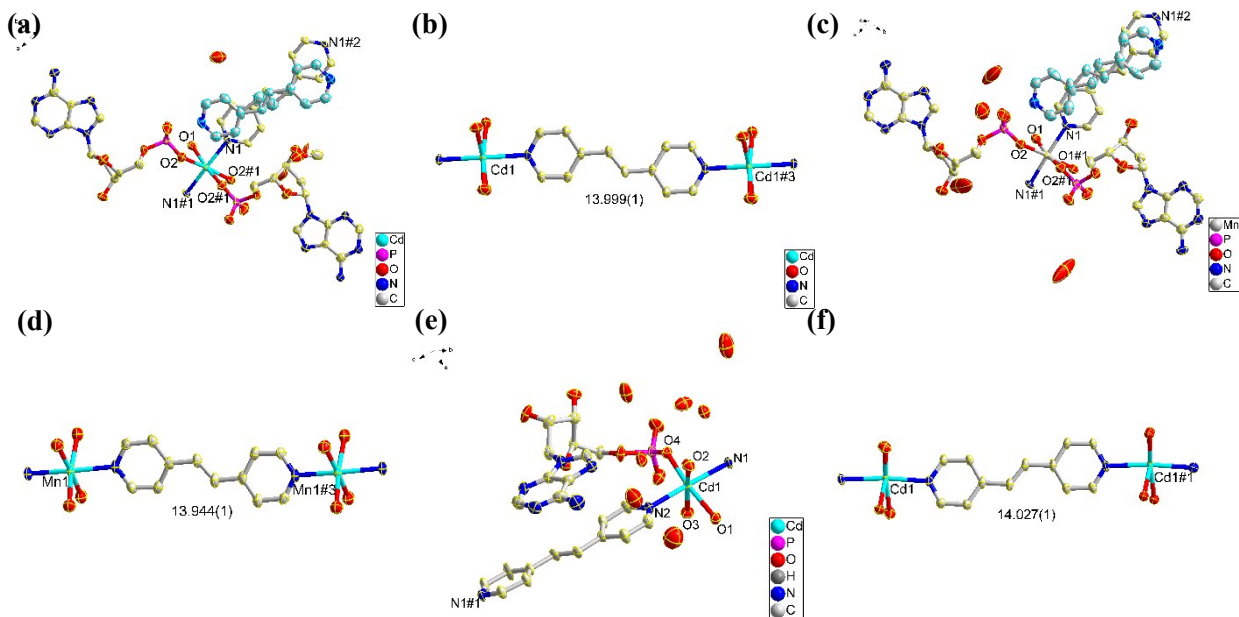

**Fig. S1.** The coordination environment of metal in molecular structure with solvent molecules (a) in Complex **1**, (b) distance between Cd-Cd in complex **1** is 13.999(1) Å (Symmetry code: #1 2-x, 1-y, z; #2 1-x, 1-y, z; #3 -1+x, y, z ); (c) in Complex **2**, (d) distance between Mn1-Mn1 in complex **2** is 13.944(1) Å (Symmetry code: #1 2-x, 1-y, z; #2 1-x, 1-y, z; #3 -1+x, y, z ); (e) in Complex **3**, (f) distance between Cd-Cd in complex **2** is 14.027(1) Å (Symmetry code: #1 x, y, 1+z).

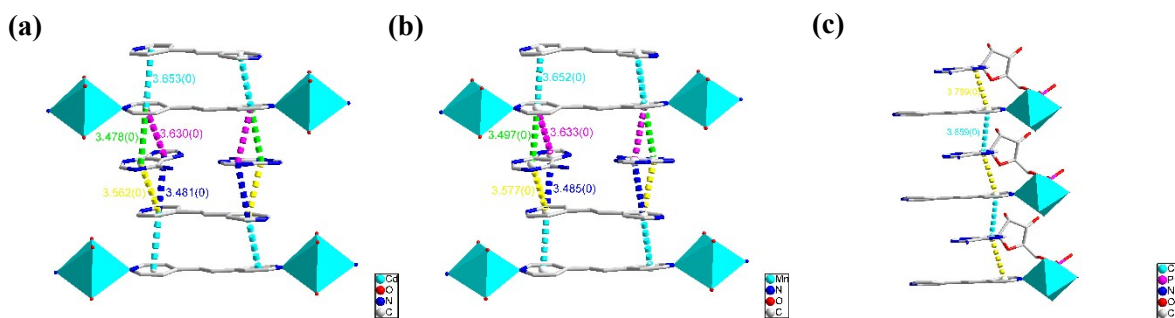

**Fig. S2.** The molecular structure with parallel distances between (a) Bpe-Adenine bases is 3.478(0) Å, 3.630(0) Å, 3.562(0) Å, 3.478(0) Å and Bpe-Bpe is 3.653(0) Å in Complex **1** (b) Bpe-Adenine bases are 3.497(0) Å, 3.633(0) Å, 3.577(0) Å, 3.485(0) Å and Bpe-Bpe is 3.652(0) Å in Complex **2** (c) Bpe-Adenine base is 3.789(0) Å and 3.659(0) Å in Complex **3**.



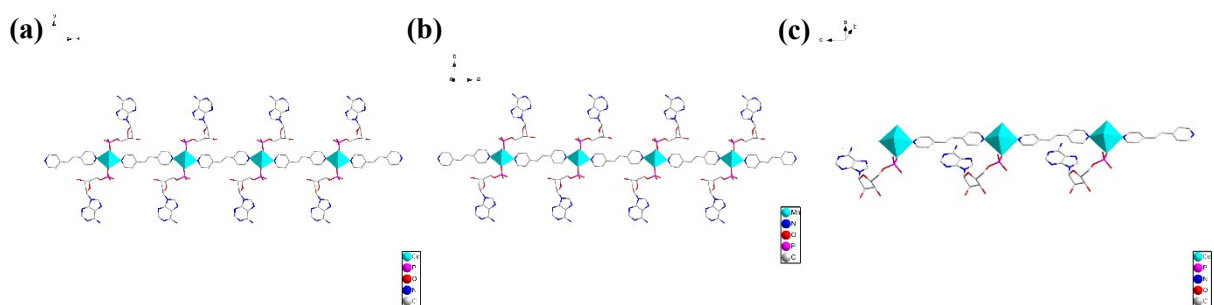

**Fig. S3:** 1D chain based on bridging ligand (Bpe) with side arms of Nucleotide ligand in **(a) Complex 1** (dAMP-Cd-Bpe) **(b) Complex 2** (dAMP-Mn-Bpe) and **(c) Complex 3** (AMP-Cd-Bpe).

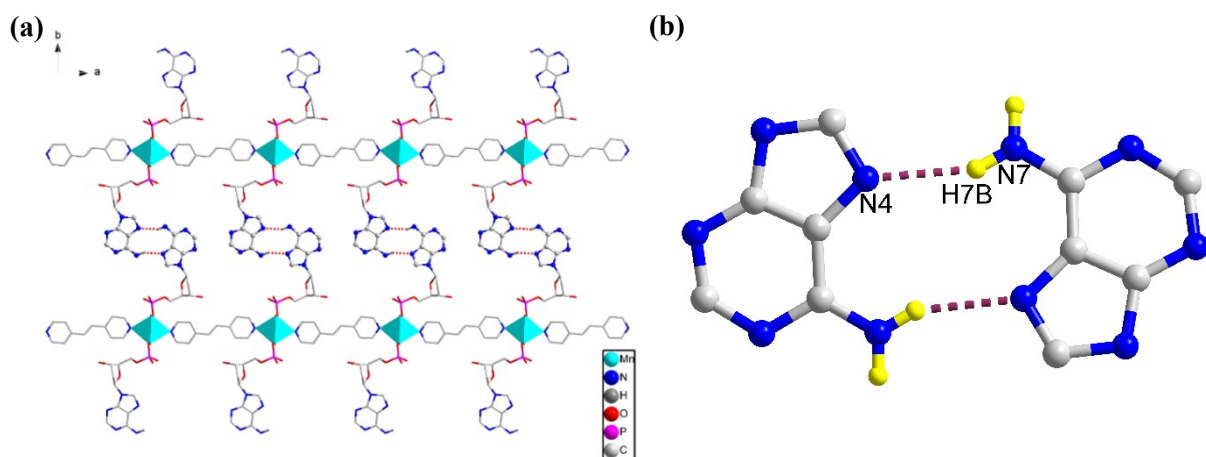

**Fig. S4:** Complex 1 (dAMP-Cd-BPE) and Complex 2 (AMP-Cd-Bpe) are isostructural **(a)** purine bases showing formation of A-Motif by hydrogen bonding in complex 2 **(b)** Structure of A-Motif showing the Distances between Hydrogen bonded atoms of purine bases in complex 2.

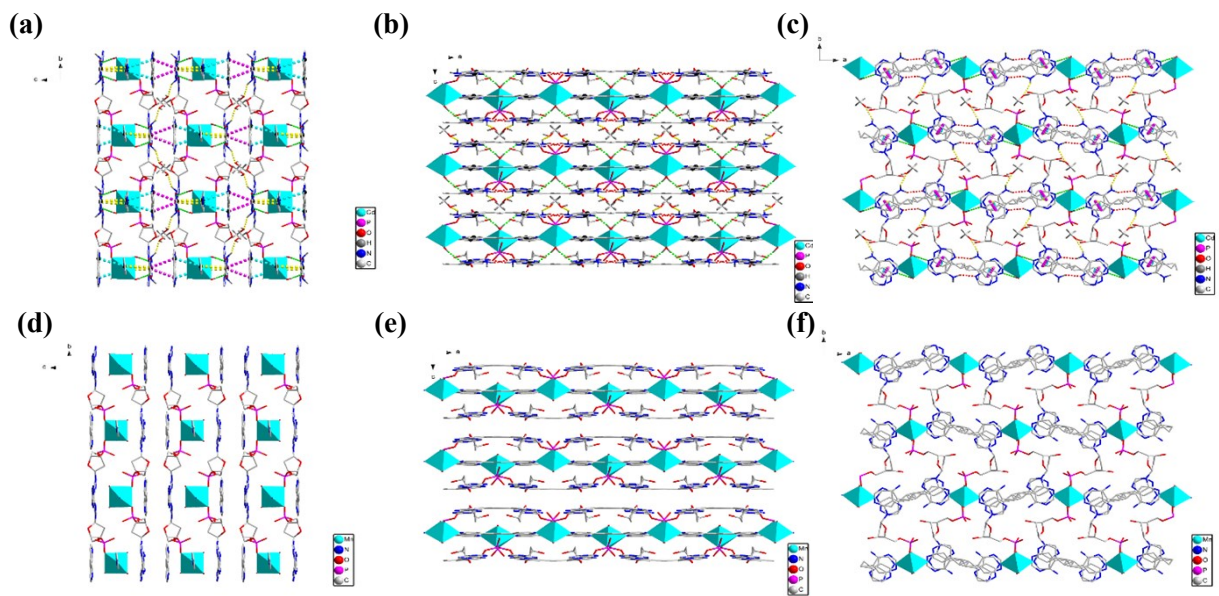

**Fig. S5:** 3D Supramolecular framework of complexes with Hydrogen bonding and pi-pi interactions (Bpe-Bpe, Bpe-Adenine, Adenine-Adenine bases) among different layers in *a*, *b*, *c*-view of **(a-c) Complex 1** (dAMP-Cd-Bpe) **(d-f) Complex 2** (dAMP-Mn-Bpe).

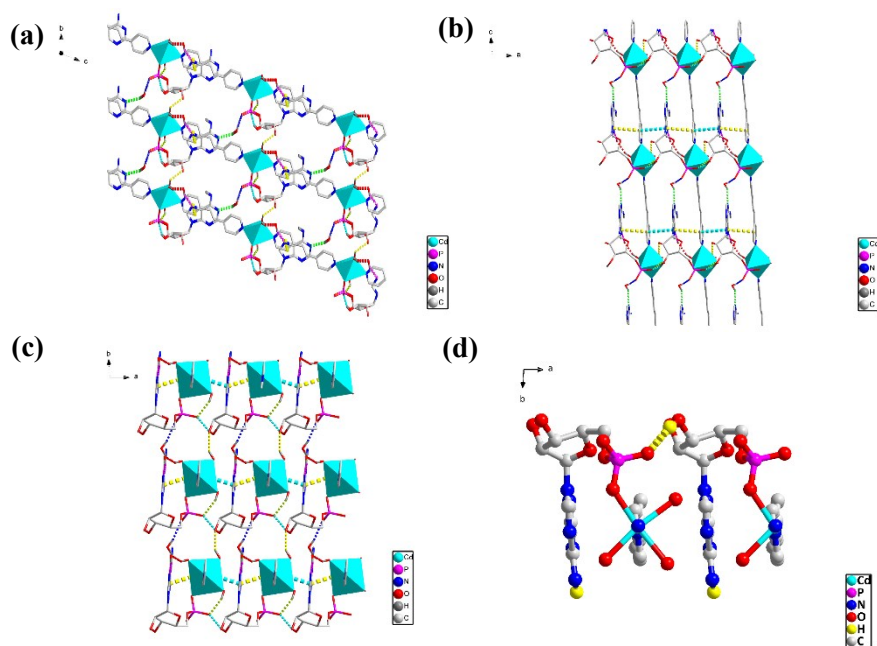

**Fig. S6:** 3D Supramolecular framework of complexes with Hydrogen bonding and pi-pi interactions (Bpe-Bpe, Bpe-Adenine, Adenine-Adenine bases) among different layers in *a*, *b*, *c*-view of **(a-c) Complex 3** (AMP-Cd-Bpe) **(d)** Hydrogen bonding between two layers in Complex 3 (AMP-Cd-Bpe).

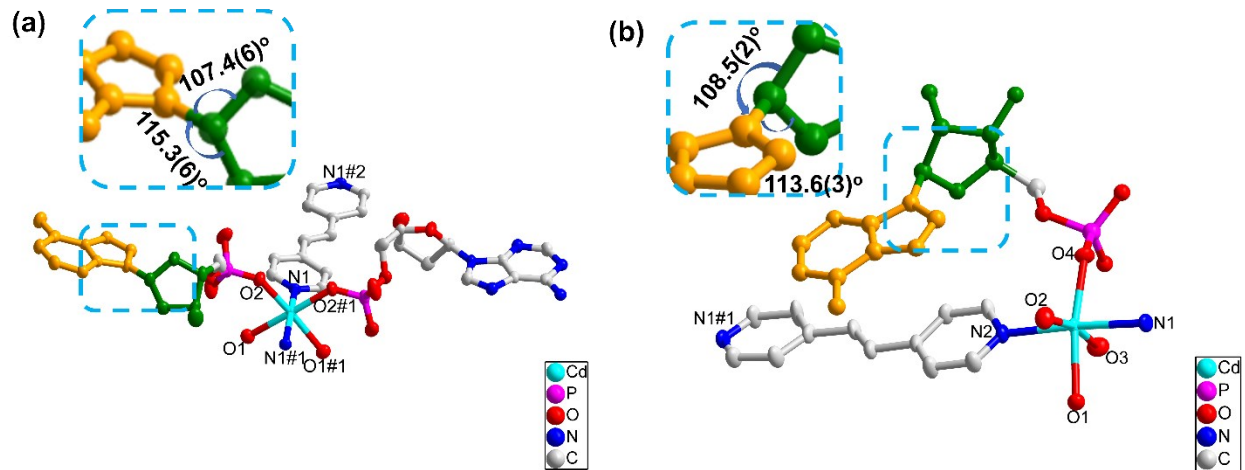

**Fig. S7:** Angle between pentose ring and adenine base of complex **2** (a), complex **3** (b). Symmetry code in (a): #1  $2-x, 1-y, +z$ ; #2  $1-x, 1-y, +z$ . Symmetry code in (b): #1  $x, y, 1+z$

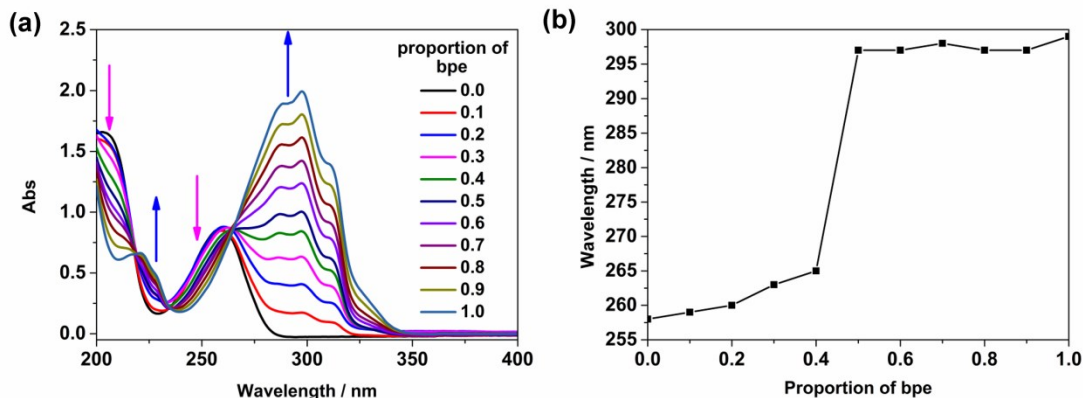

**Fig. S8:** (a) UV/Vis spectroscopy titration of Mn-AMP (1:1) upon addition of bpe. The total concentration of AMP and bpe is held fixed ( $3.75 \times 10^{-5}$  M) varying the ratio of the components bpe. (b) Plot of the compound formation of Mn-AMP with bpe monitored with UV/vis spectra.

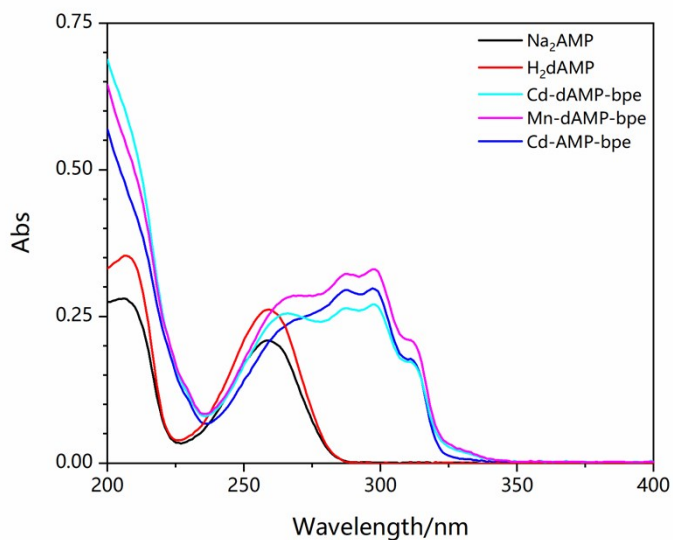

**Fig. S9:** UV/vis absorption spectra of AMP, dAMP and their coordination complexes with Mn(II) and Co(II) ions. The spectra were obtained by measuring approximately  $1.0 \times 10^{-5}$  mol·L<sup>-1</sup> solution in 1 cm cell.



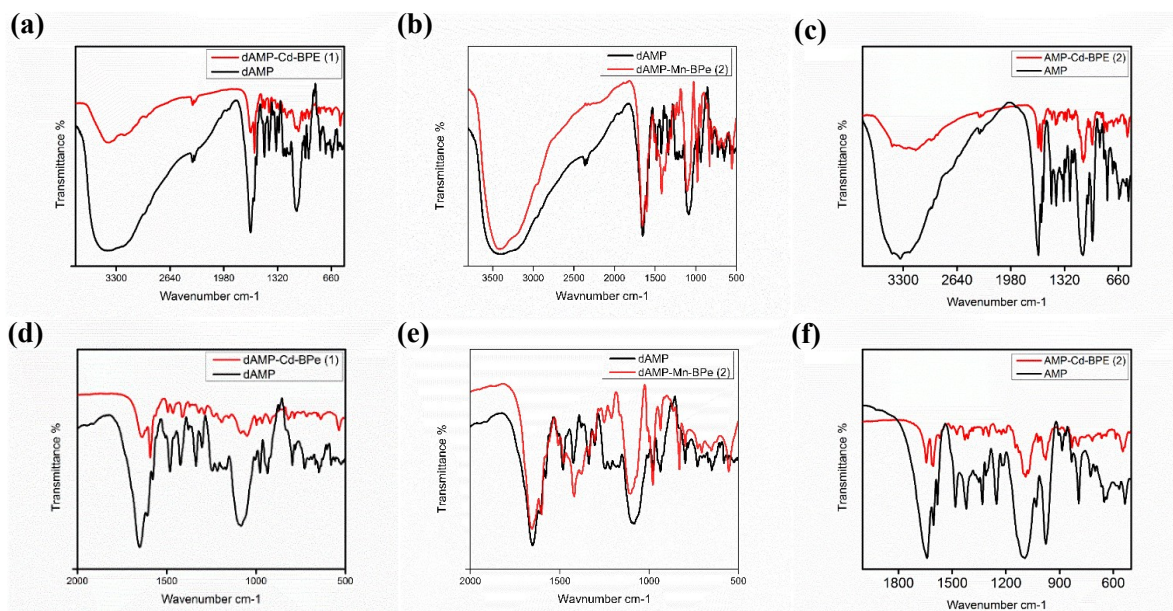

**Fig. S10:** Comparison of Infrared spectrum measured from wavenumber in range of  $4000-500\text{ cm}^{-1}$  and  $2000-500\text{ cm}^{-1}$  (a) IR spectra of dAMP (Black), dAMP-Cd-Bpe (Complex 1) (red). (b) IR spectra of dAMP (Black), dAMP-Mn-Bpe (Complex 1) (red). (c) IR spectra of AMP (Black) and AMP-Cd-Bpe (Complex 2) (Red) showing match with each other prove the presence of AMP in Complexes (d) Showing the IR ( $2000-500\text{ cm}^{-1}$ ) of dAMP and Complex1, (e) dAMP-Complex 2 and (f) AMP-Complex 3.

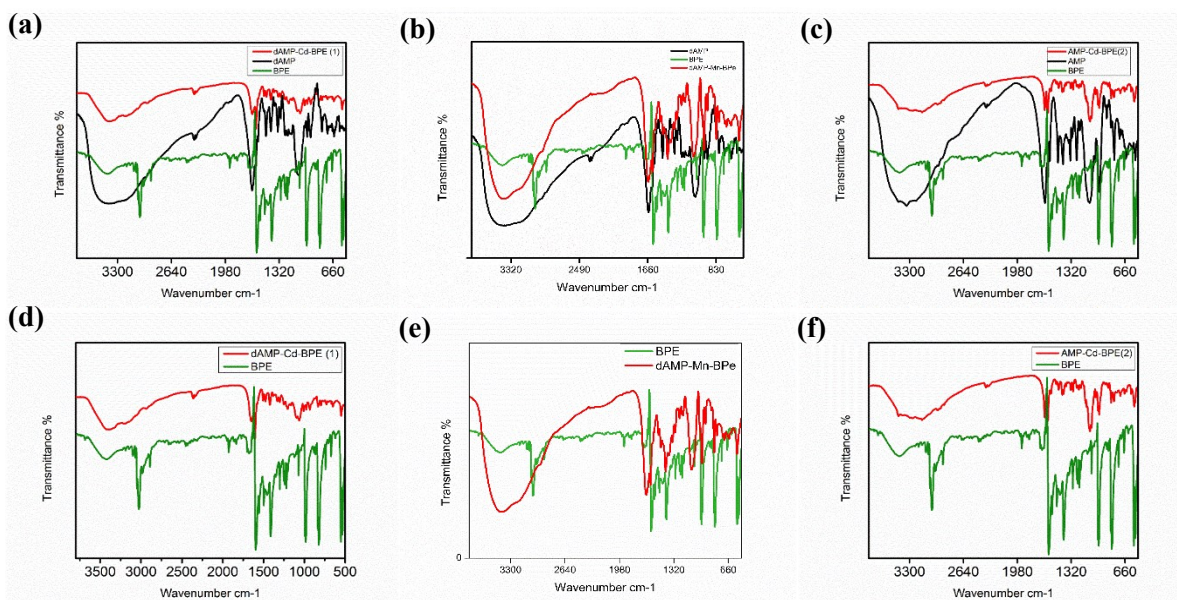

**Fig. S11:** (a) IR spectra of dAMP (Black), Bpe (Green) and dAMP-Cd-BPE (Complex 1) (Red) (b) IR spectra of dAMP (Black), Bpe (Green) and dAMP-Mn-BPE (Complex 2) (Red) (c) IR spectra of AMP (Black), Bpe (Green) and AMP-Cd-BPE (Complex 3) (Red) (d) IR spectra of Bpe (Green) dAMP-Cd-BPE (Complex 1) (red) (e) IR spectra of Bpe (Green) dAMP-Mn-BPE (Complex 1) (red) (f) IR spectra of Bpe (Green) AMP-Cd-BPE (Complex 3) (red). A new absorption peak around  $1500\text{ cm}^{-1}$  and  $1100\text{ cm}^{-1}$  appeared in spectra of complex 1-3.

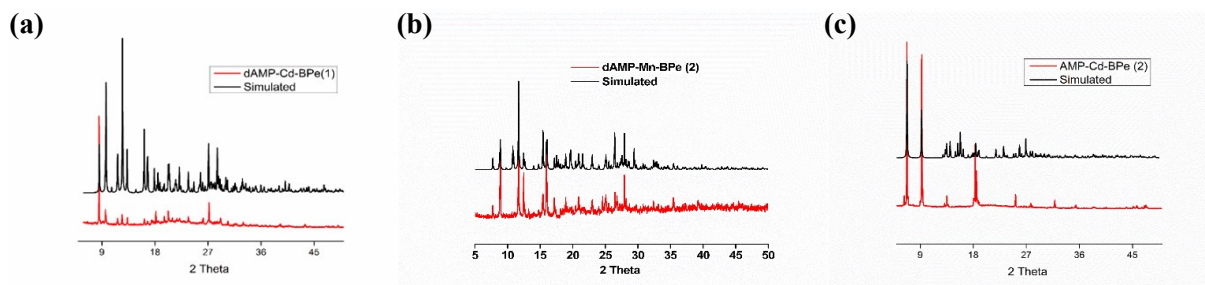

**Fig. S12:** X-ray powder diffraction (PXRD) measurements as a pure phase, similar with their single crystals. PXRD patterns show the comparison between the experimental value and Simulated for complex1 **(a)** Complex 2 **(b)** and Complex 3 **(c)**.

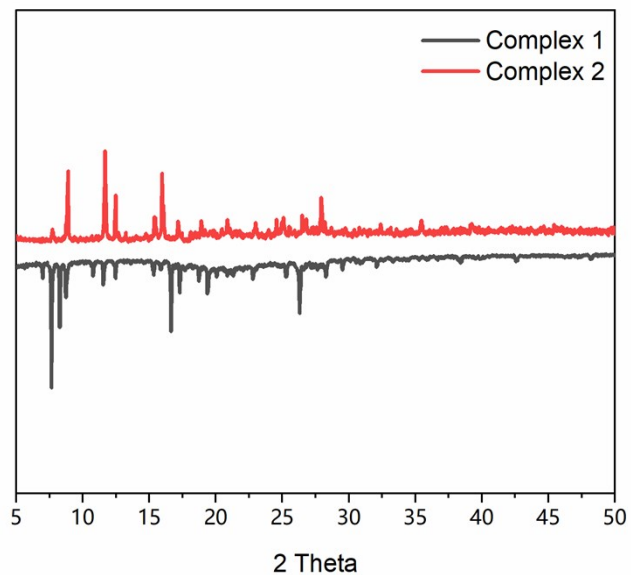

**Fig. S13:** X-ray powder diffraction (PXRD) for complex1 and Complex 2.
